# Supplementary figures and images for: RETRACTED ARTICLE: Long non-coding RNA GATA6-AS1 upregulates GATA6 to regulate the biological behaviors of lung adenocarcinoma cells
Source: Springer Nature journal article supplement (doi:10.1186/s12890-021-01521-7), 2021-05-15

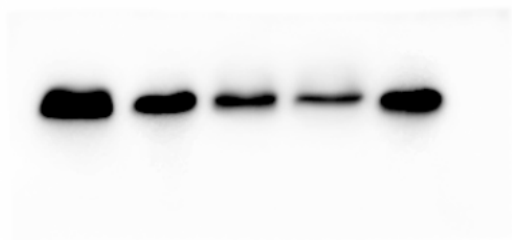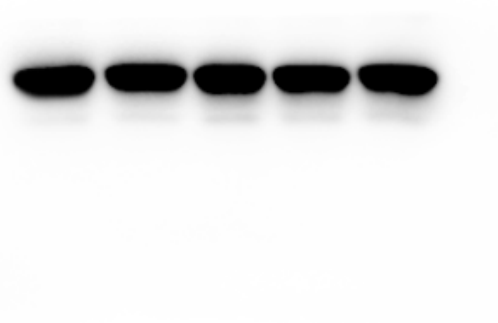

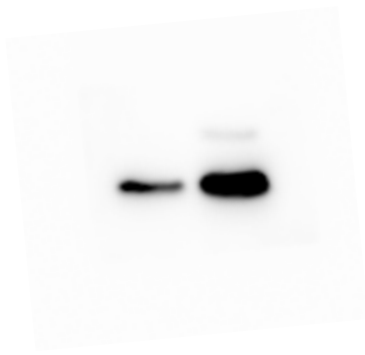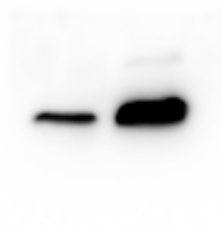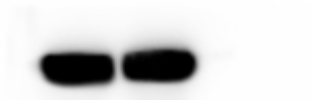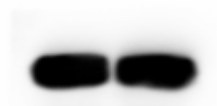

Supplement: MOESM1 [file 19165172]
